# Supplementary material for: Multifunctional titanium phosphate carriers for enhancing drug delivery and evaluating real-time therapeutic efficacy of a hydrophobic drug component in Euphorbia kansui
Source: Royal Society of Chemistry journal article supplement (doi:10.1039/d1an00163a), 2021-01-01
Supplement: d1an00163a1.pdf [file d1an00163a1.pdf]

## Supporting information

### Multifunctional titanium phosphate carriers for evaluating real-time therapeutic efficacy of a hydrophobic drug component in *Euphorbia kansui*

Da Luo<sup>a†</sup>, Yi Zhang<sup>a†</sup>, Minyu Wang<sup>a</sup>, Chen Zhu<sup>a</sup>, Yue Yao<sup>a</sup>, Weifeng Yao<sup>a</sup>, Li Zhang<sup>\*a,b</sup> and Fang-Fang Cheng<sup>\*a</sup>

<sup>a</sup> Jiangsu Key Laboratory for High Technology Research of TCM Formulae, National and Local Collaborative Engineering Center of Chinese Medicinal Resources Industrialization and Formulae Innovative Medicine and Jiangsu Collaborative Innovation Center of Chinese Medicinal Resources Industrialization, Nanjing University of Chinese Medicine, Nanjing 210023, China

<sup>b</sup> Nanjing University of Chinese Medicine Hanlin College, Taizhou 225300, PR China

†These authors contributed equally to this work

Corresponding authors.

E-mail addresses: ffcheng@njucm.edu.cn (F.-F. Cheng), [zhangli@njucm.edu.cn](mailto:zhangli@njucm.edu.cn) (L. Zhang)

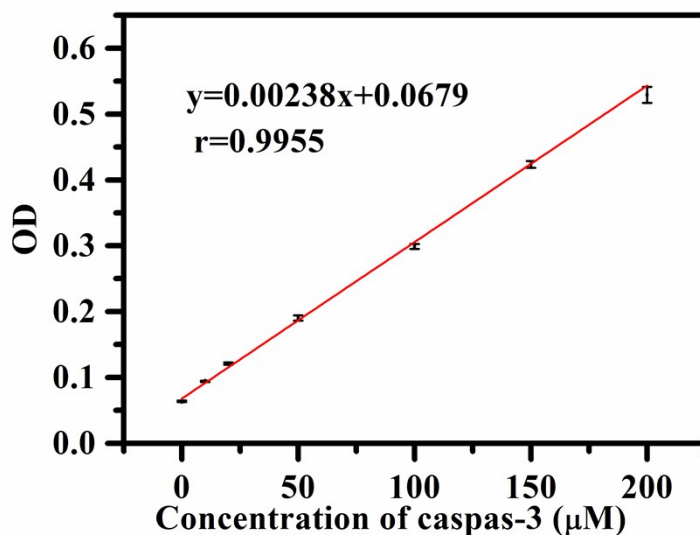

Figure S1 The standard curve of caspase-3 detected via assay kit

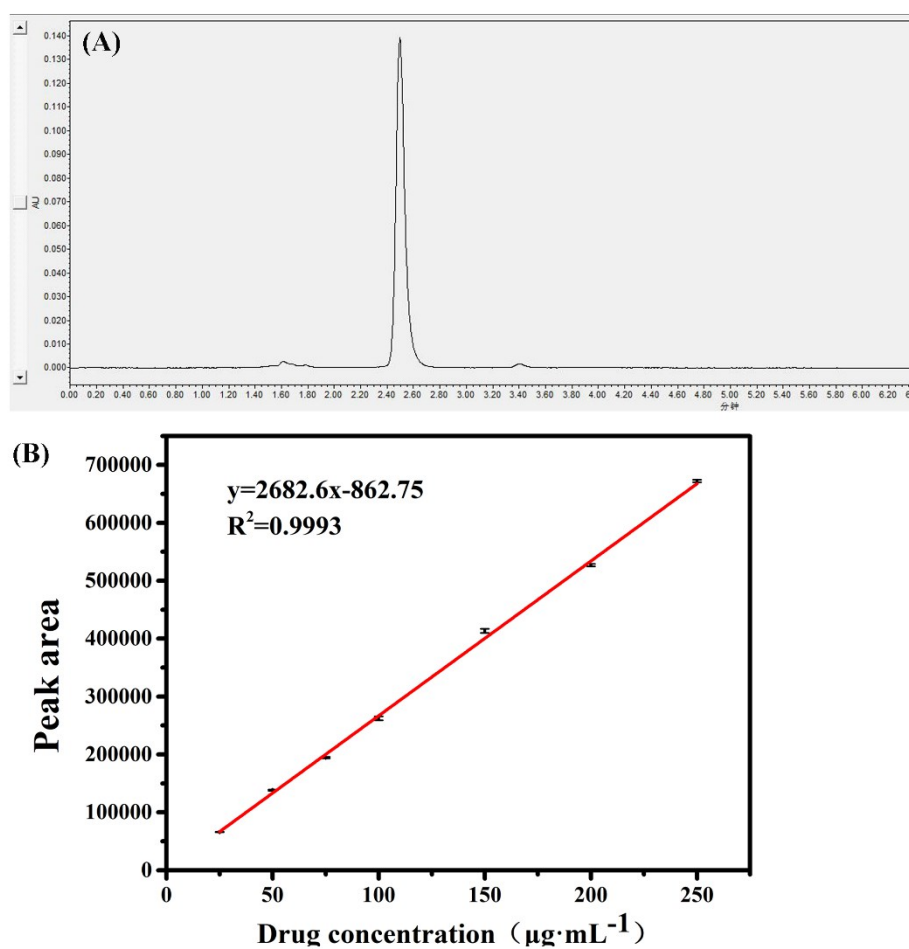

Figure S2 (A) Typical HPLC spectrum of KS-01. (B) The standard curve of KS-01 in different concentration detected by HPLC.
